# Supplementary material for: Model-Informed Precision Dosing of Linezolid in Patients with Drug-Resistant Tuberculosis
Source: MDPI journal article supplement (doi:10.3390/pharmaceutics14040753), 2022-03-30
Supplement: s1 [file s1]

## Supplementary materials

# Model-Informed Precision Dosing of Linezolid in Patients with Drug-Resistant Tuberculosis

Laurynas Mockeliunas, Lina Keutzer, Marieke G.G. Sturkenboom, Mathieu S. Bolhuis, Lotte M.G. Hulskotte, Onno W. Akkerman and Ulrika S.H. Simonsson

Email: [ulrika.Simonsson@farmbio.uu.se](mailto:ulrika.Simonsson@farmbio.uu.se)

**Table S1.** Summary of the different regimens included in the analysis dataset

| Regimen    | Number of PK sampling occasions<br>(total = 155)* | Proportion of total PK sampling occasions |
|------------|---------------------------------------------------|-------------------------------------------|
| 150 mg QD  | 7                                                 | 0.045                                     |
| 200 mg QD  | 5                                                 | 0.032                                     |
| 200 mg BID | 8                                                 | 0.052                                     |
| 300 mg QD  | 33                                                | 0.213                                     |
| 300 mg BID | 53                                                | 0.342                                     |
| 400 mg QD  | 1                                                 | 0.006                                     |
| 600 mg QD  | 34                                                | 0.219                                     |
| 600 mg BID | 14                                                | 0.090                                     |

\*Number of PK sampling occasions represents the total number of occasions as some patients had more than one PK sampling occasion; BID – dosing every 12 hours; QD – dosing every 24 hours

**Table S2.** Covariate relationships evaluated in the population pharmacokinetic analysis

| Parameter                               | Type of covariate                     | Covariate                                                                                                                |
|-----------------------------------------|---------------------------------------|--------------------------------------------------------------------------------------------------------------------------|
| <i>CL/F</i> (L/h/70 kg)                 | time-constant, continuous covariates  | age, creatinine clearance <sup>a</sup>                                                                                   |
|                                         | time-constant, categorical covariates | alcohol abuse, sex, diabetes, HIV co-infection, pre-emptive use of erythropoietin, smoking, origin of birth (WHO region) |
|                                         | time-varying, categorical covariates  | P-gp inhibitors, P-gp inducers, CYP3A4 inhibitors, CYP3A4 inducers                                                       |
| <i>V/F</i> (L/70 kg)                    | time-constant, categorical covariates | alcohol abuse, sex, diabetes, HIV co-infection, pre-emptive use of erythropoietin, smoking, origin of birth (WHO region) |
| <i>k<sub>a</sub></i> (h <sup>-1</sup> ) | time-constant, categorical covariates | alcohol abuse, sex, diabetes, HIV co-infection, smoking                                                                  |
|                                         | time-varying, categorical covariates  | P-gp inhibitors, P-gp inducers                                                                                           |
| <i>MTT</i> (h)                          | time-constant, categorical covariates | alcohol abuse, sex, diabetes, HIV co-infection, smoking                                                                  |
|                                         | time-varying, categorical covariates  | P-gp inhibitors, P-gp inducers                                                                                           |

<sup>a</sup>Calculated using the Cockcroft-Gault equation [1], using lean body weight instead of regular body weight for patients with BMI higher than 25, and with creatinine clearance truncated at 150 mL/min (13 patients had a creatinine clearance above 150 mL/min).

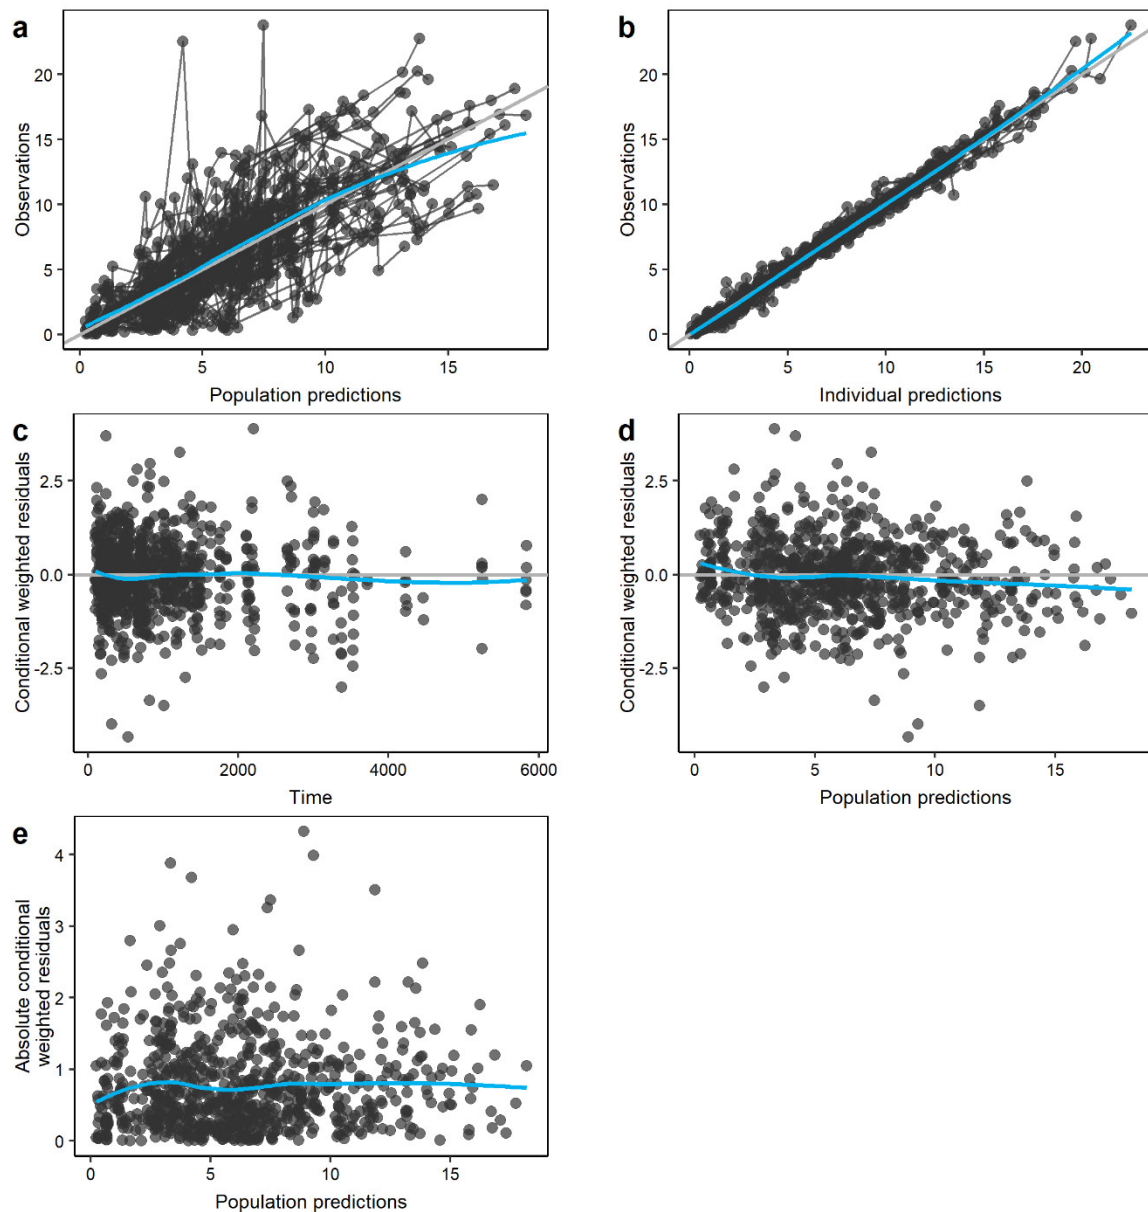

**Figure S1.** Goodness-of-fit plots for the final population pharmacokinetic model. Panel a–Population predictions vs. Observations, b–Individual predictions vs. Observations; c–Conditional weighted residuals vs. Time, d–Conditional weighted residuals vs. Population predictions, e–Absolute conditional individual weighted residuals vs. Population predictions.

In panels a and b, the grey line represents the line of identity, while the blue line is a smoothed trendline through data. The trendless flat blue line going through zero abscissa in panel c indicates that the structural model describes the data well; the trendless flat blue line in panel d indicates that there are no model misspecification present; the trendless flat blue line in panel e shows that the selected error model is appropriate.

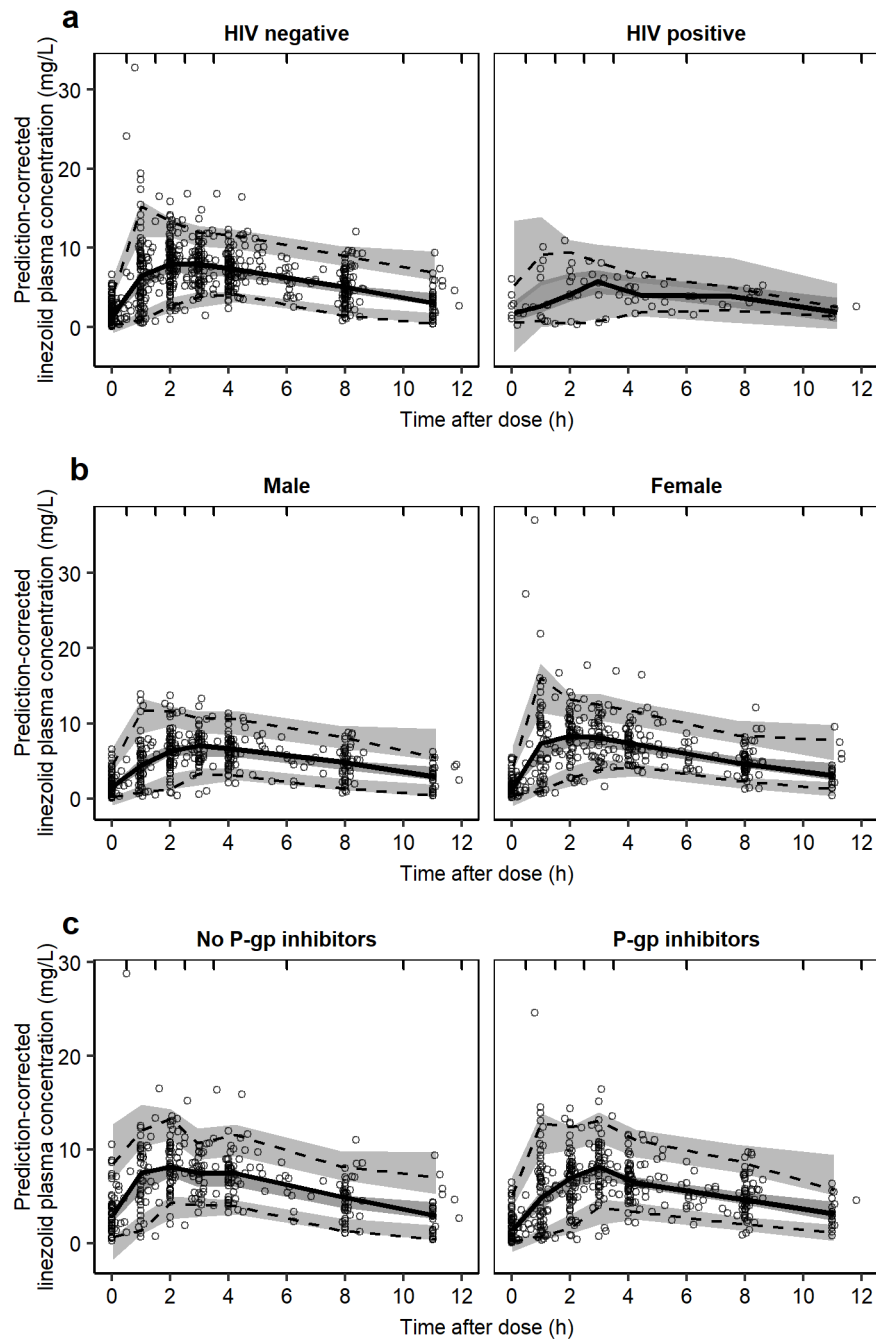

**Figure S2.** Prediction corrected visual predictive checks (pcVPC) for the final linezolid population pharmacokinetic model stratified on covariates. The solid and dashed lines are the median, 2.5th and 97.5th percentiles of the observed data, respectively. The shaded areas (top to bottom) are the 95% confidence intervals of the 97.5th (light grey), median (grey) and 2.5th (light grey) percentiles of the simulated data based on 1000 simulations. Open circles are prediction-corrected observation points. Panel a shows a pcVPC stratified on the effect of HIV co-infection on  $CL/F$ , while panel b shows a pcVPC stratified on the effect of sex on  $k_a$ , and panel c shows a pcVPC stratified on the effect of co-administration of P-gp inhibitors on  $MTT$ .

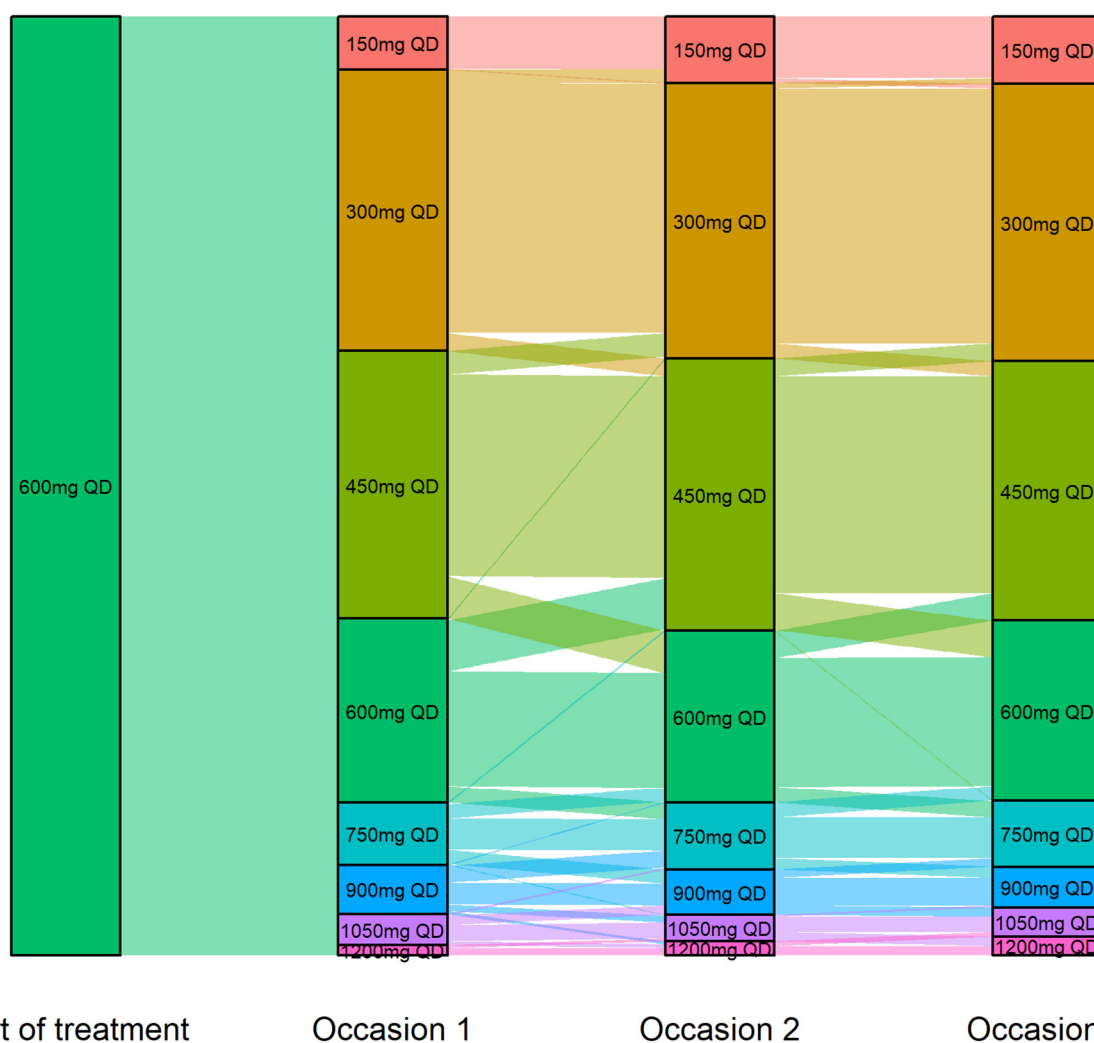

**Figure S3.** Sankey plot showing individual dose adjustments for three consecutive PK sampling occasions, each one week apart. The size of the boxes represents the proportion of patients falling within the respective category. The lines show the proportion of patients transitioning to another category, here dosing regimen. QD, once daily; BID, twice daily.

**Text S1.** NONMEM model code for the final population pharmacokinetic model

\$SIZES LVR=50

\$SIZES LNP4=60000

\$PROBLEM Final Linezolid POPPK model with inhibition compartment

\$INPUT ID AMT II DV OCC LOQ TAD TIME ADDL DRUG DATASET DOSE  
INTERVAL STRAT PLOT CMT=DROP FLAG EVID DAYS BWAD AGE SEX WHO  
HIV DIABETES SMOKING ALCOHOL PREEPO CLCR PGP\_IND PGP\_INH  
CYP\_INH CYP\_IND

; ID - patient identifier

; AMT – linezolid amount administered (mg)

; II - dosing interval, needed for ADDL

; DV - dependent variable, plasma concentrations

; OCC - sampling occasion

; LOQ - indicator, if value was below LLOQ, if yes, DV was set to LLOQ/2

; TAD - time after dose

; TIME - time from start of enrolment

; ADDL - additional daily doses, required

; DRUG - indicator if Zyvoxid or generic was administered

; DATASET - indicator which dataset the data came from

; DOSE - AMT for plotting purposes

; INTERVAL - II for plotting purposes

; STRAT - Variable for plotting purposes, AMT+II

; PLOT - variable for plotting purposes, OCC+AMT+II

; CMT - compartment

; FLAG - variable for AUC calculation

; EVID - event ID

; DAYS - time in days

```

; BWAD - bodyweight at admission

; AGE – age in years

; SEX - sex

; WHO - WHO region that the patient was born in

; HIV - HIV status

; DIABETES - diabetes status

; SMOKING - smoking status

; ALCOHOL - alcohol abuse, more than 1 or 2 glasses of alcohol/day and less than 2
days/week no alcohol (before TB treatment)

; PREEPO - Pre-emptive use of erythropoietin

; CLCR - creatinine clearance, calculated using Cockcroft-Gault formula

; PGP_IND - administration of P-gp inducers

; PGP_INH - administration of P-gp inhibitors

; CYP_INH - administration of CYP3A4 inhibitors

; CYP_IND - administration of CYP3A4 inducers

$DATA    ../data.csv IGNORE=@

$SUBROUTINE ADVAN13 TRANS1 TOL=10

$MODEL NCOMP=8 COMP=(DEPOT,DEFDOSE) COMP=(CENTRAL,DEFOBS)
COMP=(TRANSIT2) COMP=(TRANSIT3) COMP=(TRANSIT4) COMP=(TRANSIT5)
COMP=(ABS) COMP=(INH)

;; The first compartment is the first transit compartment

$PK

;;;;CL covariates relationships;;;;

;;; CLHIV-DEFINITION START

IF(HIV.EQ.0) CLHIV=1; Most common case, indicator variable is 1

IF(HIV.EQ.1) CLHIV=(1+THETA(10))

;;; CLHIV-DEFINITION END

```

```

;;; CL-RELATION START
CLCOV=CLHIV
;;; CL-RELATION END

;;;;KA covariates relationships;;;;

;;; KASEX-DEFINITION START
IF(SEX.EQ.0) KASEX=1
IF(SEX.EQ.1) KASEX=(1+THETA(11))
;;; KASEX-DEFINITION END


;;; KA-RELATION START
KACOV=KASEX
;;; KA-RELATION END

;;;;MTT covariates relationships;;;;

;;; MTTPGP_INH-DEFINITION START
IF(PGP_INH.EQ.0) MTTPGP_INH=1
IF(PGP_INH.EQ.1) MTTPGP_INH=(1+THETA(12))
;;; MTTPGP_INH-DEFINITION END

;;; MTT-RELATION START
MTTCOV=MTTPGP_INH
;;; MTT-RELATION END

TVCL  = THETA(1)*(BWAD/70)**0.75 ; apparent clearance (CL)
TVCL  = CLCOV*TVCL

TVV   = THETA(2)*(BWAD/70) ; apparent volume of distribution (V)
TVKA  = THETA(3) ; absorption rate constant (ka)
TVKA  = KACOV*TVKA

TVMTT = THETA(6) ; mean transit time (MTT)

```



$$TVMTT = MTTCOV * TVMTT$$

$$TVKIC = THETA(7) \quad ; \text{rate constant into the inhibition compartment}$$

$$TVRCLF = THETA(8) \quad ; \text{remaining clearance fraction uninhibited}$$

$$TVIC50 = THETA(9) \quad ; \text{concentration in the inhibition compartment yielding half of CL inhibition}$$

$$IOV\_CL = 0 \quad ; \text{IOV on apparent clearance}$$

$$\text{IF}(\text{OCC.EQ.1}) \text{ IOV\_CL} = \text{ETA}(4)$$

$$\text{IF}(\text{OCC.EQ.2}) \text{ IOV\_CL} = \text{ETA}(5)$$

$$\text{IF}(\text{OCC.EQ.3}) \text{ IOV\_CL} = \text{ETA}(6)$$

$$\text{IF}(\text{OCC.EQ.4}) \text{ IOV\_CL} = \text{ETA}(7)$$

$$\text{IF}(\text{OCC.EQ.5}) \text{ IOV\_CL} = \text{ETA}(8)$$

$$\text{IF}(\text{OCC.EQ.6}) \text{ IOV\_CL} = \text{ETA}(9)$$

$$\text{IF}(\text{OCC.EQ.7}) \text{ IOV\_CL} = \text{ETA}(10)$$

$$IOV\_V = 0 \quad ; \text{IOV on apparent volume of distribution}$$

$$\text{IF}(\text{OCC.EQ.1}) \text{ IOV\_V} = \text{ETA}(11)$$

$$\text{IF}(\text{OCC.EQ.2}) \text{ IOV\_V} = \text{ETA}(12)$$

$$\text{IF}(\text{OCC.EQ.3}) \text{ IOV\_V} = \text{ETA}(13)$$

$$\text{IF}(\text{OCC.EQ.4}) \text{ IOV\_V} = \text{ETA}(14)$$

$$\text{IF}(\text{OCC.EQ.5}) \text{ IOV\_V} = \text{ETA}(15)$$

$$\text{IF}(\text{OCC.EQ.6}) \text{ IOV\_V} = \text{ETA}(16)$$

$$\text{IF}(\text{OCC.EQ.7}) \text{ IOV\_V} = \text{ETA}(17)$$

$$IOV\_KA = 0 \quad ; \text{IOV on absorption rate constant}$$

$$\text{IF}(\text{OCC.EQ.1}) \text{ IOV\_KA} = \text{ETA}(18)$$

$$\text{IF}(\text{OCC.EQ.2}) \text{ IOV\_KA} = \text{ETA}(19)$$

IF(OCC.EQ.3) IOV\_KA = ETA(20)

IF(OCC.EQ.4) IOV\_KA = ETA(21)

IF(OCC.EQ.5) IOV\_KA = ETA(22)

IF(OCC.EQ.6) IOV\_KA = ETA(23)

IF(OCC.EQ.7) IOV\_KA = ETA(24)

IOV\_MTT = 0 ; IOV on mean transit time

IF(OCC.EQ.1) IOV\_MTT = ETA(25)

IF(OCC.EQ.2) IOV\_MTT = ETA(26)

IF(OCC.EQ.3) IOV\_MTT = ETA(27)

IF(OCC.EQ.4) IOV\_MTT = ETA(28)

IF(OCC.EQ.5) IOV\_MTT = ETA(29)

IF(OCC.EQ.6) IOV\_MTT = ETA(30)

IF(OCC.EQ.7) IOV\_MTT = ETA(31)

CL = TVCL\*EXP(ETA(1) + IOV\_CL)

V = TVV\*EXP(IOV\_V)

KA = TVKA\*EXP(IOV\_KA)

K20 = CL/V ; elimination rate constant

MTT = TVMTT\*EXP(ETA(2) + IOV\_MTT)

NN = 5 ; number of transit compartments (hard-coded)

KIC = TVKIC

RCLF = TVRCLF

IC50 = TVIC50

KTR = (NN+1)/MTT

K13 = KTR

$$K34 = KTR$$

$$K45 = KTR$$

$$K56 = KTR$$

$$K67 = KTR$$

$$K72 = KA$$

\$DES

$$CP = A(2)/V$$

$$DADT(1) = -KTR*A(1)$$

$$DADT(2) = KA*A(7) - K20*A(2)*(RCLF+(1-RCLF)*(1-A(8)/(IC50+A(8)))) ; \text{central compartment}$$

$$DADT(3) = KTR*A(1) - KTR*A(3)$$

$$DADT(4) = KTR*A(3) - KTR*A(4)$$

$$DADT(5) = KTR*A(4) - KTR*A(5)$$

$$DADT(6) = KTR*A(5) - KTR*A(6)$$

$$DADT(7) = KTR*A(6) - KA*A(7) ; \text{absorption compartment}$$

$$DADT(8) = KIC*(CP - A(8)) ; \text{inhibition compartment}$$

\$ERROR

$$IPRED = A(2)/V ; \text{combined residual error}$$

$$IRES = DV - IPRED$$

$$W = \text{SQRT}((\text{THETA}(4)*IPRED)**2 + \text{THETA}(5)**2)$$

$$IWRES = IRES/W$$

$$Y = IPRED + W*EPS(1)$$

$$A1 = A(1) ; \text{transit compartment}$$

$$A2 = A(2) ; \text{central compartment}$$

$A3 = A(3)$  ; transit compartment  
 $A4 = A(4)$  ; transit compartment  
 $A5 = A(5)$  ; transit compartment  
 $A6 = A(6)$  ; transit compartment  
 $A7 = A(7)$  ; absorption compartment  
 $A8 = A(8)$  ; inhibition compartment

\$THETA

$(0,6.10679)$  ; CL  
 $(0,53.9716)$  ; V  
 $(0,2.50423)$  ; KA  
 $(0,0.268449)$  ; PROP ERROR  
 $(0,0.578366)$  ; ADD ERROR  
 $(0,0.718694)$  ; MTT  
 0.0005 FIX ; KIC  
 $(0,0.894458,1)$  ; RCLF  
 0.38 FIX ; IC50  
 $(-1,0.571775,5)$  ; CLHIV1  
 $(-1,0.988896,5)$  ; KASEX1  
 $(-1,0.988896,5)$  ; MTTPGP\_INH1

\$OMEGA

0.0739769 ; IIV\_CL  
 0.402776 ; IIV\_MTT

\$OMEGA BLOCK(1) 2.48E-02 ; IOV\_CL

\$OMEGA BLOCK(1) SAME ; IOV\_CL

\$OMEGA BLOCK(1) SAME ; IOV\_CL  
\$OMEGA BLOCK(1) SAME ; IOV\_CL  
\$OMEGA BLOCK(1) SAME ; IOV\_CL  
\$OMEGA BLOCK(1) SAME ; IOV\_CL  
\$OMEGA BLOCK(1) SAME ; IOV\_CL

\$OMEGA BLOCK(1) 2.48E-02 ; IOV\_V  
\$OMEGA BLOCK(1) SAME ; IOV\_V  
\$OMEGA BLOCK(1) 2.48E-02 ; IOV\_KA  
\$OMEGA BLOCK(1) SAME ; IOV\_KA  
\$OMEGA BLOCK(1) 2.48E-02 ; IOV\_MTT  
\$OMEGA BLOCK(1) SAME ; IOV\_MTT

```

$OMEGA BLOCK(1) SAME      ; IOV_MTT

$SIGMA 1 FIX              ; RESIDUAL ERROR

$ESTIMATION METHOD=1 INTER MAXEVAL=9999 NSIG=3 SIGL=9 PRINT=3
NOABORT

$COVARIANCE PRINT=E MATRIX=R

$TABLE ID IPRED IWRES CWRES NPDE DV TIME TAD OCC EVID INTERVAL
STRAT PLOT                NOPRINT ONEHEADER FILE=sdtab1

$TABLE ID DOSE DRUG DATASET SEX WHO HIV DIABETES SMOKING
ALCOHOL                   NOPRINT ONEHEADER FILE=catab1

$TABLE ID BWAD AGE PREEPO CLCR  NOPRINT ONEHEADER FILE=cotab1

$TABLE ID CL V KA MTT RCLF IC50 KIC W ETA1 ETA2
                           NOPRINT ONEHEADER FILE=patab1

```

## References

- [1] Cockcroft, D.W.; Gault, M.H. Prediction of creatinine clearance from serum creatinine. *Nephron* **1976**, 16:31–41. <https://doi.org/10.1159/000180580>.
